# Supplementary material for: Archimedean Muirhead Aggregation Operators of q‐Rung Orthopair Fuzzy Numbers for Multicriteria Group Decision Making
Source: Hindawi journal article supplement (doi:10.1155/2019/3103741), 2019-01-01
Supplement: f1 [file 3103741.f1.pdf]

## SUPPLEMENTARY MATERIAL

### APPENDIX A. PROOF OF THEOREM 1

**Proof:**

(1) Let

$$\mu = f^{-1} \left( \frac{1}{\sum_{i=1}^n \delta_i} f \left( g^{-1} \left( \frac{1}{n!} \sum_{p \in P_n} g \left( f^{-1} \left( \sum_{i=1}^n (\delta_i f(\mu_{p(i)})) \right) \right) \right) \right) \right), \quad \nu = g^{-1} \left( \frac{1}{\sum_{i=1}^n \delta_i} g \left( f^{-1} \left( \frac{1}{n!} \sum_{p \in P_n} f \left( g^{-1} \left( \sum_{i=1}^n (\delta_i g(\nu_{p(i)})) \right) \right) \right) \right) \right)$$

To prove  $qROFAMM^{\Delta}(\Xi_1, \Xi_2, \dots, \Xi_n) = \langle \mu, \nu \rangle$ , we need to prove

$$\left( \frac{1}{n!} \bigoplus_{p \in P_n} \bigotimes_{i=1}^n (\Xi_{p(i)}^{\delta_i}) \right) \sum_{i=1}^n \delta_i = \langle \mu, \nu \rangle$$

The proof process is as follow:

According to the power operation in Equation (4), we have

$$\Xi_{p(i)}^{\delta_i} = \left\langle f^{-1}(\delta_i f(\mu_{p(i)})), g^{-1}(\delta_i g(\nu_{p(i)})) \right\rangle$$

According to the product operation in Equation (2), we can obtain

$$\bigotimes_{i=1}^n (\Xi_{p(i)}^{\delta_i}) = \left\langle f^{-1} \left( \sum_{i=1}^n (\delta_i f(\mu_{p(i)})) \right), g^{-1} \left( \sum_{i=1}^n (\delta_i g(\nu_{p(i)})) \right) \right\rangle$$

According to the sum operation in Equation (1), we have

$$\bigoplus_{p \in P_n} \bigotimes_{i=1}^n (\Xi_{p(i)}^{\delta_i}) = \left\langle g^{-1} \left( \sum_{p \in P_n} g \left( f^{-1} \left( \sum_{i=1}^n (\delta_i f(\mu_{p(i)})) \right) \right) \right), f^{-1} \left( \sum_{p \in P_n} f \left( g^{-1} \left( \sum_{i=1}^n (\delta_i g(\nu_{p(i)})) \right) \right) \right) \right\rangle$$

According to multiplication operation in Equation (3), we can obtain

$$\frac{1}{n!} \bigoplus_{p \in P_n} \bigotimes_{i=1}^n (\Xi_{p(i)}^{\delta_i}) = \left\langle g^{-1} \left( \frac{1}{n!} \sum_{p \in P_n} g \left( f^{-1} \left( \sum_{i=1}^n (\delta_i f(\mu_{p(i)})) \right) \right) \right), f^{-1} \left( \frac{1}{n!} \sum_{p \in P_n} f \left( g^{-1} \left( \sum_{i=1}^n (\delta_i g(\nu_{p(i)})) \right) \right) \right) \right\rangle$$

The following expression is obtained according to the power operation in Equation (4)

$$\left( \frac{1}{n!} \bigoplus_{p \in P_n} \bigotimes_{i=1}^n (\Xi_{p(i)}^{\delta_i}) \right) \sum_{i=1}^n \delta_i = \left\langle f^{-1} \left( \frac{1}{\sum_{i=1}^n \delta_i} f \left( g^{-1} \left( \frac{1}{n!} \sum_{p \in P_n} g \left( f^{-1} \left( \sum_{i=1}^n (\delta_i f(\mu_{p(i)})) \right) \right) \right) \right) \right), \right. \\ \left. g^{-1} \left( \frac{1}{\sum_{i=1}^n \delta_i} g \left( f^{-1} \left( \frac{1}{n!} \sum_{p \in P_n} f \left( g^{-1} \left( \sum_{i=1}^n (\delta_i g(\nu_{p(i)})) \right) \right) \right) \right) \right) \right\rangle$$

(2) To prove  $qROFAMM^{\Delta}(\Xi_1, \Xi_2, \dots, \Xi_n)$  is a qROFN, we need to prove  $0 \leq \mu \leq 1$ ,  $0 \leq \nu \leq 1$ , and  $0 \leq \mu^q + \nu^q \leq 1$ . We firstly prove  $0 \leq \mu \leq 1$  and  $0 \leq \nu \leq 1$ . The proof process is as follow:

1) According to the definition of a qROFN in Definition 1, we have  $0 \leq \mu_{p(i)} \leq 1$ . Because  $f(t)$  is monotonically decreasing, we further have

$$\delta_i f(0) \geq \delta_i f(\mu_{p(i)}) \geq \delta_i f(1)$$

and

$$\left( \sum_{i=1}^n \delta_i \right) f(0) = \sum_{i=1}^n (\delta_i f(0)) \geq \sum_{i=1}^n (\delta_i f(\mu_{p(i)})) \geq \sum_{i=1}^n (\delta_i f(1)) = \left( \sum_{i=1}^n \delta_i \right) f(1)$$

Since  $f^{-1}(t)$  is monotonically decreasing, we can obtain

$$f^{-1} \left( \left( \sum_{i=1}^n \delta_i \right) f(0) \right) \leq f^{-1} \left( \sum_{i=1}^n (\delta_i f(\mu_{p(i)})) \right) \leq f^{-1} \left( \left( \sum_{i=1}^n \delta_i \right) f(1) \right)$$

Because  $g(t)$  is monotonically increasing, we further have

$$g \left( f^{-1} \left( \left( \sum_{i=1}^n \delta_i \right) f(0) \right) \right) \leq g \left( f^{-1} \left( \sum_{i=1}^n (\delta_i f(\mu_{p(i)})) \right) \right) \leq g \left( f^{-1} \left( \left( \sum_{i=1}^n \delta_i \right) f(1) \right) \right)$$

and

$$\begin{aligned} (n!) g \left( f^{-1} \left( \left( \sum_{i=1}^n \delta_i \right) f(0) \right) \right) &= \sum_{p \in P_n} g \left( f^{-1} \left( \left( \sum_{i=1}^n \delta_i \right) f(0) \right) \right) \leq \sum_{p \in P_n} g \left( f^{-1} \left( \sum_{i=1}^n (\delta_i f(\mu_{p(i)})) \right) \right) \leq \\ &\sum_{p \in P_n} g \left( f^{-1} \left( \left( \sum_{i=1}^n \delta_i \right) f(1) \right) \right) = (n!) g \left( f^{-1} \left( \left( \sum_{i=1}^n \delta_i \right) f(1) \right) \right) \end{aligned}$$

and

$$g \left( f^{-1} \left( \left( \sum_{i=1}^n \delta_i \right) f(0) \right) \right) \leq \frac{1}{n!} \sum_{p \in P_n} g \left( f^{-1} \left( \sum_{i=1}^n (\delta_i f(\mu_{p(i)})) \right) \right) \leq g \left( f^{-1} \left( \left( \sum_{i=1}^n \delta_i \right) f(1) \right) \right)$$

Since  $g^{-1}(t)$  is monotonically increasing, we can obtain

$$\begin{aligned} f^{-1} \left( \left( \sum_{i=1}^n \delta_i \right) f(0) \right) &= g^{-1} \left( g \left( f^{-1} \left( \left( \sum_{i=1}^n \delta_i \right) f(0) \right) \right) \right) \leq g^{-1} \left( \frac{1}{n!} \sum_{p \in P_n} g \left( f^{-1} \left( \sum_{i=1}^n (\delta_i f(\mu_{p(i)})) \right) \right) \right) \leq \\ &g^{-1} \left( g \left( f^{-1} \left( \left( \sum_{i=1}^n \delta_i \right) f(1) \right) \right) \right) = f^{-1} \left( \left( \sum_{i=1}^n \delta_i \right) f(1) \right) \end{aligned}$$

Because  $f(t)$  is monotonically decreasing, we further have

$$\begin{aligned} \left( \sum_{i=1}^n \delta_i \right) f(0) &= f \left( f^{-1} \left( \left( \sum_{i=1}^n \delta_i \right) f(0) \right) \right) \geq f \left( g^{-1} \left( \frac{1}{n!} \sum_{p \in P_n} g \left( f^{-1} \left( \sum_{i=1}^n (\delta_i f(\mu_{p(i)})) \right) \right) \right) \right) \geq \\ &f \left( f^{-1} \left( \left( \sum_{i=1}^n \delta_i \right) f(1) \right) \right) = \left( \sum_{i=1}^n \delta_i \right) f(1) \end{aligned}$$

and

$$f(0) \geq \frac{1}{\sum_{i=1}^n \delta_i} f \left( g^{-1} \left( \frac{1}{n!} \sum_{p \in P_n} g \left( f^{-1} \left( \sum_{i=1}^n (\delta_i f(\mu_{p(i)})) \right) \right) \right) \right) \geq f(1)$$

Finally, since  $f^{-1}(t)$  is monotonically decreasing, we can obtain

$$0 = f^{-1}(f(0)) \leq f^{-1} \left( \frac{1}{\sum_{i=1}^n \delta_i} f \left( g^{-1} \left( \frac{1}{n!} \sum_{p \in P_n} g \left( f^{-1} \left( \sum_{i=1}^n (\delta_i f(\mu_{p(i)})) \right) \right) \right) \right) \right) \leq f^{-1}(f(1)) = 1$$

That is  $0 \leq \mu \leq 1$ . Similarly, we can prove  $0 \leq \nu \leq 1$ .

2) We then prove  $0 \leq \mu^q + \nu^q \leq 1$ . The proof process is as follow:

Since  $0 \leq \mu \leq 1$  and  $0 \leq \nu \leq 1$ , we have  $0 \leq \mu^q \leq 1$  and  $0 \leq \nu^q \leq 1$ , and thus  $0 \leq \mu^q + \nu^q \leq 2$ .

According to the definition of a qROFN in Definition 1, we have  $\mu_{p(i)}^q + \nu_{p(i)}^q \leq 1$  and  $\mu_{p(i)}^q \leq 1 - \nu_{p(i)}^q$ . Since  $f(t)$  is monotonically decreasing, we further have

$$f(\mu_{p(i)}^q) \geq f(1 - \nu_{p(i)}^q)$$

Because  $f(1-t) = g(t)$ , we have

$$f(\mu_{p(i)}^q) \geq g(\nu_{p(i)}^q)$$

and

$$\sum_{i=1}^n (\delta_i f(\mu_{p(i)}^q)) \geq \sum_{i=1}^n (\delta_i g(\nu_{p(i)}^q))$$

Since  $f^{-1}(t)$  is monotonically decreasing, we can obtain

$$f^{-1}\left(\sum_{i=1}^n (\delta_i f(\mu_{p(i)}^q))\right) \leq f^{-1}\left(\sum_{i=1}^n (\delta_i g(\nu_{p(i)}^q))\right)$$

Because  $f^{-1}(t) = 1 - g^{-1}(t)$ , we have

$$f^{-1}\left(\sum_{i=1}^n (\delta_i f(\mu_{p(i)}^q))\right) \leq 1 - g^{-1}\left(\sum_{i=1}^n (\delta_i g(\nu_{p(i)}^q))\right)$$

Since  $g(t)$  is monotonically increasing, we further have

$$g\left(f^{-1}\left(\sum_{i=1}^n (\delta_i f(\mu_{p(i)}^q))\right)\right) \leq g\left(1 - g^{-1}\left(\sum_{i=1}^n (\delta_i g(\nu_{p(i)}^q))\right)\right)$$

Because  $g(1-t) = f(t)$ , we can obtain

$$g\left(f^{-1}\left(\sum_{i=1}^n (\delta_i f(\mu_{p(i)}^q))\right)\right) \leq f\left(g^{-1}\left(\sum_{i=1}^n (\delta_i g(\nu_{p(i)}^q))\right)\right)$$

and

$$\frac{1}{n!} \sum_{p \in P_n} g\left(f^{-1}\left(\sum_{i=1}^n (\delta_i f(\mu_{p(i)}^q))\right)\right) \leq \frac{1}{n!} \sum_{p \in P_n} f\left(g^{-1}\left(\sum_{i=1}^n (\delta_i g(\nu_{p(i)}^q))\right)\right)$$

Since  $g^{-1}(t)$  is monotonically increasing, we have

$$g^{-1}\left(\frac{1}{n!} \sum_{p \in P_n} g\left(f^{-1}\left(\sum_{i=1}^n (\delta_i f(\mu_{p(i)}^q))\right)\right)\right) \leq g^{-1}\left(\frac{1}{n!} \sum_{p \in P_n} f\left(g^{-1}\left(\sum_{i=1}^n (\delta_i g(\nu_{p(i)}^q))\right)\right)\right)$$

Because  $g^{-1}(t) = 1 - f^{-1}(t)$ , we further have

$$g^{-1}\left(\frac{1}{n!} \sum_{p \in P_n} g\left(f^{-1}\left(\sum_{i=1}^n (\delta_i f(\mu_{p(i)}^q))\right)\right)\right) \leq 1 - f^{-1}\left(\frac{1}{n!} \sum_{p \in P_n} f\left(g^{-1}\left(\sum_{i=1}^n (\delta_i g(\nu_{p(i)}^q))\right)\right)\right)$$

Since  $f(t)$  is monotonically decreasing, we can obtain

$$\frac{1}{\sum_{i=1}^n \delta_i} f\left(g^{-1}\left(\frac{1}{n!} \sum_{p \in P_n} g\left(f^{-1}\left(\sum_{i=1}^n (\delta_i f(\mu_{p(i)}^q))\right)\right)\right)\right) \geq \frac{1}{\sum_{i=1}^n \delta_i} f\left(1 - f^{-1}\left(\frac{1}{n!} \sum_{p \in P_n} f\left(g^{-1}\left(\sum_{i=1}^n (\delta_i g(\nu_{p(i)}^q))\right)\right)\right)\right)$$

Because  $f(1-t) = g(t)$ , we can obtain

$$\frac{1}{\sum_{i=1}^n \delta_i} f \left( g^{-1} \left( \frac{1}{n!} \sum_{p \in P_n} g \left( f^{-1} \left( \sum_{i=1}^n (\delta_i f(\mu_{p(i)}^q)) \right) \right) \right) \right) \geq \frac{1}{\sum_{i=1}^n \delta_i} g \left( f^{-1} \left( \frac{1}{n!} \sum_{p \in P_n} f \left( g^{-1} \left( \sum_{i=1}^n (\delta_i g(v_{p(i)}^q)) \right) \right) \right) \right)$$

Since  $f^{-1}(t)$  is monotonically decreasing, we have

$$f^{-1} \left( \frac{1}{\sum_{i=1}^n \delta_i} f \left( g^{-1} \left( \frac{1}{n!} \sum_{p \in P_n} g \left( f^{-1} \left( \sum_{i=1}^n (\delta_i f(\mu_{p(i)}^q)) \right) \right) \right) \right) \right) \leq f^{-1} \left( \frac{1}{\sum_{i=1}^n \delta_i} g \left( f^{-1} \left( \frac{1}{n!} \sum_{p \in P_n} f \left( g^{-1} \left( \sum_{i=1}^n (\delta_i g(v_{p(i)}^q)) \right) \right) \right) \right) \right)$$

Finally, because  $f^{-1}(t) = 1 - g^{-1}(t)$ , we can obtain

$$f^{-1} \left( \frac{1}{\sum_{i=1}^n \delta_i} f \left( g^{-1} \left( \frac{1}{n!} \sum_{p \in P_n} g \left( f^{-1} \left( \sum_{i=1}^n (\delta_i f(\mu_{p(i)}^q)) \right) \right) \right) \right) \right) \leq 1 - g^{-1} \left( \frac{1}{\sum_{i=1}^n \delta_i} g \left( f^{-1} \left( \frac{1}{n!} \sum_{p \in P_n} f \left( g^{-1} \left( \sum_{i=1}^n (\delta_i g(v_{p(i)}^q)) \right) \right) \right) \right) \right)$$

and

$$f^{-1} \left( \frac{1}{\sum_{i=1}^n \delta_i} f \left( g^{-1} \left( \frac{1}{n!} \sum_{p \in P_n} g \left( f^{-1} \left( \sum_{i=1}^n (\delta_i f(\mu_{p(i)}^q)) \right) \right) \right) \right) \right) + g^{-1} \left( \frac{1}{\sum_{i=1}^n \delta_i} g \left( f^{-1} \left( \frac{1}{n!} \sum_{p \in P_n} f \left( g^{-1} \left( \sum_{i=1}^n (\delta_i g(v_{p(i)}^q)) \right) \right) \right) \right) \right) \leq 1$$

When  $q = 1$ , according to the above inequality, we have

$$f^{-1} \left( \frac{1}{\sum_{i=1}^n \delta_i} f \left( g^{-1} \left( \frac{1}{n!} \sum_{p \in P_n} g \left( f^{-1} \left( \sum_{i=1}^n (\delta_i f(\mu_{p(i)})) \right) \right) \right) \right) \right) + g^{-1} \left( \frac{1}{\sum_{i=1}^n \delta_i} g \left( f^{-1} \left( \frac{1}{n!} \sum_{p \in P_n} f \left( g^{-1} \left( \sum_{i=1}^n (\delta_i g(v_{p(i)})) \right) \right) \right) \right) \right) \leq 1$$

That is,  $\mu + v \leq 1$ .

Now we need to prove that the inequality also holds when  $q = 2, 3, \dots$ . Let  $m = 2, 3, \dots$ . The purpose is transformed into proof of  $\mu^m + v^m \leq 1$ .

According to  $\mu + v \leq 1$  and the binomial theorem, we can obtain

$$(\mu + v)^m = \sum_{k=0}^m (C_m^k \mu^{m-k} v^k) = \mu^m + v^m + \sum_{k=1}^{m-1} (C_m^k \mu^{m-k} v^k) \leq 1$$

Because  $\mu \geq 0$  and  $v \geq 0$ , we have

$$\sum_{k=1}^{m-1} (C_m^k \mu^{m-k} v^k) \geq 0$$

Therefore, we can obtain  $\mu^m + v^m \leq 1$ . Now it can be concluded that  $\mu^q + v^q \leq 1$  for  $q = 1, 2, 3, \dots$ .

Since we have proved  $0 \leq \mu^q + v^q \leq 2$  and  $\mu^q + v^q \leq 1$ , we can obtain  $0 \leq \mu^q + v^q \leq 1$ .

## APPENDIX B. PROOF OF THEOREM 2

**Proof:**

Since  $\mu_i = \mu$  and  $p(i)$  is a permutation of  $(1, 2, \dots, n)$ , we have

$$\delta_i f(\mu_{p(i)}) = \delta_i f(\mu)$$

and

$$\sum_{i=1}^n (\delta_i f(\mu_{p(i)})) = \sum_{i=1}^n (\delta_i f(\mu)) = \left( \sum_{i=1}^n \delta_i \right) (f(\mu))$$

Then we can obtain

$$f^{-1}\left(\sum_{i=1}^n(\delta_i f(\mu_{p(i)}))\right) = f^{-1}\left(\left(\sum_{i=1}^n \delta_i\right)(f(\mu))\right)$$

and

$$g\left(f^{-1}\left(\sum_{i=1}^n(\delta_i f(\mu_{p(i)}))\right)\right) = g\left(f^{-1}\left(\left(\sum_{i=1}^n \delta_i\right)(f(\mu))\right)\right)$$

Further, we have

$$\frac{1}{n!} \sum_{p \in P_n} g\left(f^{-1}\left(\sum_{i=1}^n(\delta_i f(\mu_{p(i)}))\right)\right) = \frac{1}{n!} \sum_{p \in P_n} \left(g\left(f^{-1}\left(\left(\sum_{i=1}^n \delta_i\right)(f(\mu))\right)\right)\right) = g\left(f^{-1}\left(\left(\sum_{i=1}^n \delta_i\right)(f(\mu))\right)\right)$$

and

$$g^{-1}\left(\frac{1}{n!} \sum_{p \in P_n} g\left(f^{-1}\left(\sum_{i=1}^n(\delta_i f(\mu_{p(i)}))\right)\right)\right) = g^{-1}\left(g\left(f^{-1}\left(\left(\sum_{i=1}^n \delta_i\right)(f(\mu))\right)\right)\right) = f^{-1}\left(\left(\sum_{i=1}^n \delta_i\right)(f(\mu))\right)$$

Finally, we can obtain

$$\frac{1}{\sum_{i=1}^n \delta_i} f\left(g^{-1}\left(\frac{1}{n!} \sum_{p \in P_n} g\left(f^{-1}\left(\sum_{i=1}^n(\delta_i f(\mu_{p(i)}))\right)\right)\right)\right) = \frac{1}{\sum_{i=1}^n \delta_i} f\left(f^{-1}\left(\left(\sum_{i=1}^n \delta_i\right)(f(\mu))\right)\right) = f(\mu)$$

and

$$f^{-1}\left(\frac{1}{\sum_{i=1}^n \delta_i} f\left(g^{-1}\left(\frac{1}{n!} \sum_{p \in P_n} g\left(f^{-1}\left(\sum_{i=1}^n(\delta_i f(\mu_{p(i)}))\right)\right)\right)\right)\right) = f^{-1}(f(\mu)) = \mu$$

Similarly, we can prove

$$g^{-1}\left(\frac{1}{\sum_{i=1}^n \delta_i} g\left(f^{-1}\left(\frac{1}{n!} \sum_{p \in P_n} f\left(g^{-1}\left(\sum_{i=1}^n(\delta_i g(v_{p(i)}))\right)\right)\right)\right)\right) = v$$

Therefore, we can obtain  $qROFAMM^\Delta(\Xi_1, \Xi_2, \dots, \Xi_n) = \langle \mu, v \rangle$ .

### APPENDIX C. PROOF OF THEOREM 3

**Proof:**

According to Theorem 1, we have

$$qROFAMM^\Delta(\Xi_{1,1}, \Xi_{1,2}, \dots, \Xi_{1,n}) = \langle \mu_I, v_I \rangle \quad \text{and} \quad qROFAMM^\Delta(\Xi_{2,1}, \Xi_{2,2}, \dots, \Xi_{2,n}) = \langle \mu_{II}, v_{II} \rangle$$

where

$$\mu_I = f^{-1}\left(\frac{1}{\sum_{i=1}^n \delta_i} f\left(g^{-1}\left(\frac{1}{n!} \sum_{p \in P_n} g\left(f^{-1}\left(\sum_{i=1}^n(\delta_i f(\mu_{p(i,i)}))\right)\right)\right)\right)\right), \quad v_I = g^{-1}\left(\frac{1}{\sum_{i=1}^n \delta_i} g\left(f^{-1}\left(\frac{1}{n!} \sum_{p \in P_n} f\left(g^{-1}\left(\sum_{i=1}^n(\delta_i g(v_{p(i,i)}))\right)\right)\right)\right)\right)$$

$$\mu_{\text{II}} = f^{-1} \left( \frac{1}{\sum_{i=1}^n \delta_i} f \left( g^{-1} \left( \frac{1}{n! \sum_{p \in P_n} g \left( f^{-1} \left( \sum_{i=1}^n (\delta_i f(\mu_{p(2,i)})) \right) \right) \right) \right) \right), \quad v_{\text{II}} = g^{-1} \left( \frac{1}{\sum_{i=1}^n \delta_i} g \left( f^{-1} \left( \frac{1}{n! \sum_{p \in P_n} f \left( g^{-1} \left( \sum_{i=1}^n (\delta_i g(v_{p(2,i)})) \right) \right) \right) \right) \right)$$

and  $0 \leq \mu_{\text{I}} \leq 1$  and  $0 \leq \mu_{\text{II}} \leq 1$ . Since  $\mu_{1,i} \geq \mu_{2,i}$  for all  $i = 1, 2, \dots, n$ , we have  $\mu_{p(1,i)} \geq \mu_{p(2,i)}$ . Because  $f(x)$  is monotonically decreasing, we can obtain

$$\sum_{i=1}^n (\delta_i f(\mu_{p(1,i)})) \leq \sum_{i=1}^n (\delta_i f(\mu_{p(2,i)}))$$

Since  $f^{-1}(x)$  is monotonically decreasing, we have

$$f^{-1} \left( \sum_{i=1}^n (\delta_i f(\mu_{p(1,i)})) \right) \geq f^{-1} \left( \sum_{i=1}^n (\delta_i f(\mu_{p(2,i)})) \right)$$

Because  $g(x)$  is monotonically increasing, we can obtain

$$\frac{1}{n! \sum_{p \in P_n} g \left( f^{-1} \left( \sum_{i=1}^n (\delta_i f(\mu_{p(1,i)})) \right) \right)} \geq \frac{1}{n! \sum_{p \in P_n} g \left( f^{-1} \left( \sum_{i=1}^n (\delta_i f(\mu_{p(2,i)})) \right) \right)}$$

Since  $g^{-1}(x)$  is monotonically increasing, we have

$$g^{-1} \left( \frac{1}{n! \sum_{p \in P_n} g \left( f^{-1} \left( \sum_{i=1}^n (\delta_i f(\mu_{p(1,i)})) \right) \right) \right) \geq g^{-1} \left( \frac{1}{n! \sum_{p \in P_n} g \left( f^{-1} \left( \sum_{i=1}^n (\delta_i f(\mu_{p(2,i)})) \right) \right) \right)$$

Because  $f(x)$  is monotonically decreasing, we can obtain

$$\frac{1}{\sum_{i=1}^n \delta_i} f \left( g^{-1} \left( \frac{1}{n! \sum_{p \in P_n} g \left( f^{-1} \left( \sum_{i=1}^n (\delta_i f(\mu_{p(1,i)})) \right) \right) \right) \right) \leq \frac{1}{\sum_{i=1}^n \delta_i} f \left( g^{-1} \left( \frac{1}{n! \sum_{p \in P_n} g \left( f^{-1} \left( \sum_{i=1}^n (\delta_i f(\mu_{p(2,i)})) \right) \right) \right) \right)$$

Finally, since  $f^{-1}(x)$  is monotonically decreasing, we have

$$f^{-1} \left( \frac{1}{\sum_{i=1}^n \delta_i} f \left( g^{-1} \left( \frac{1}{n! \sum_{p \in P_n} g \left( f^{-1} \left( \sum_{i=1}^n (\delta_i f(\mu_{p(1,i)})) \right) \right) \right) \right) \right) \geq f^{-1} \left( \frac{1}{\sum_{i=1}^n \delta_i} f \left( g^{-1} \left( \frac{1}{n! \sum_{p \in P_n} g \left( f^{-1} \left( \sum_{i=1}^n (\delta_i f(\mu_{p(2,i)})) \right) \right) \right) \right) \right)$$

That is  $\mu_{\text{I}} \geq \mu_{\text{II}}$ . Similarly, we can prove  $v_{\text{I}} \leq v_{\text{II}}$ . Since

$$S(qROFAMM^{\Delta}(\Xi_{1,1}, \Xi_{1,2}, \dots, \Xi_{1,n})) = \mu_{\text{I}}^q - v_{\text{I}}^q \text{ and } S(qROFAMM^{\Delta}(\Xi_{2,1}, \Xi_{2,2}, \dots, \Xi_{2,n})) = \mu_{\text{II}}^q - v_{\text{II}}^q$$

and  $1 \geq \mu_{\text{I}} \geq \mu_{\text{II}} \geq 0$  and  $0 \leq v_{\text{I}} \leq v_{\text{II}} \leq 1$ , we can obtain

$$S(qROFAMM^{\Delta}(\Xi_{1,1}, \Xi_{1,2}, \dots, \Xi_{1,n})) \geq S(qROFAMM^{\Delta}(\Xi_{2,1}, \Xi_{2,2}, \dots, \Xi_{2,n}))$$

and thus  $qROFAMM^{\Delta}(\Xi_{1,1}, \Xi_{1,2}, \dots, \Xi_{1,n}) \geq qROFAMM^{\Delta}(\Xi_{2,1}, \Xi_{2,2}, \dots, \Xi_{2,n})$ .

## APPENDIX D. PROOF OF THEOREM 4

**Proof:**

According to Theorem 3, we have

$$qROFAMM^{\Delta}(\Xi_{\text{LB}}, \Xi_{\text{LB}}, \dots, \Xi_{\text{LB}}) \leq qROFAMM^{\Delta}(\Xi_1, \Xi_2, \dots, \Xi_n) \leq qROFAMM^{\Delta}(\Xi_{\text{UB}}, \Xi_{\text{UB}}, \dots, \Xi_{\text{UB}})$$

According to Theorem 2, we have

$$qROFAMM^{\Delta}(\Xi_{\text{LB}}, \Xi_{\text{LB}}, \dots, \Xi_{\text{LB}}) = \Xi_{\text{LB}} \text{ and } qROFAMM^{\Delta}(\Xi_{\text{UB}}, \Xi_{\text{UB}}, \dots, \Xi_{\text{UB}}) = \Xi_{\text{UB}}$$

Therefore, we can obtain  $\Xi_{\text{LB}} \leq qROFAMM^{\Delta}(\Xi_1, \Xi_2, \dots, \Xi_n) \leq \Xi_{\text{UB}}$ .



(2) To prove  $qROFWAMM^\Delta(\Xi_1, \Xi_2, \dots, \Xi_n)$  is a qROFN, we need to prove  $0 \leq \mu \leq 1$ ,  $0 \leq \nu \leq 1$ , and  $0 \leq \mu^q + \nu^q \leq 1$ . We firstly prove  $0 \leq \mu \leq 1$  and  $0 \leq \nu \leq 1$ . The proof process is as follow:

1) According to the definition of a qROFN in Definition 1, we have  $0 \leq \mu_{p(i)} \leq 1$ . Because  $g(t)$  and  $g^{-1}(t)$  are monotonically increasing, we further have

$$(nw_{p(i)})g(0) \leq (nw_{p(i)})g(\mu_{p(i)}) \leq (nw_{p(i)})g(1)$$

and

$$g^{-1}\left((nw_{p(i)})g(0)\right) \leq g^{-1}\left((nw_{p(i)})g(\mu_{p(i)})\right) \leq g^{-1}\left((nw_{p(i)})g(1)\right)$$

Since  $f(t)$  and  $f^{-1}(t)$  are monotonically decreasing, we can obtain

$$\sum_{i=1}^n \left( \delta_i f \left( g^{-1} \left( (nw_{p(i)})g(0) \right) \right) \right) \geq \sum_{i=1}^n \left( \delta_i f \left( g^{-1} \left( (nw_{p(i)})g(\mu_{p(i)}) \right) \right) \right) \geq \sum_{i=1}^n \left( \delta_i f \left( g^{-1} \left( (nw_{p(i)})g(1) \right) \right) \right)$$

and

$$f^{-1} \left( \sum_{i=1}^n \left( \delta_i f \left( g^{-1} \left( (nw_{p(i)})g(0) \right) \right) \right) \right) \leq f^{-1} \left( \sum_{i=1}^n \left( \delta_i f \left( g^{-1} \left( (nw_{p(i)})g(\mu_{p(i)}) \right) \right) \right) \right) \leq f^{-1} \left( \sum_{i=1}^n \left( \delta_i f \left( g^{-1} \left( (nw_{p(i)})g(1) \right) \right) \right) \right)$$

Because  $g(t)$  and  $g^{-1}(t)$  are monotonically increasing, we have

$$\begin{aligned} g \left( f^{-1} \left( \left( \sum_{i=1}^n \delta_i \right) f(0) \right) \right) &= \frac{1}{n!} \sum_{p \in P_n} g \left( f^{-1} \left( \sum_{i=1}^n \left( \delta_i f \left( g^{-1} \left( (nw_{p(i)})g(0) \right) \right) \right) \right) \right) \leq \frac{1}{n!} \sum_{p \in P_n} g \left( f^{-1} \left( \sum_{i=1}^n \left( \delta_i f \left( g^{-1} \left( (nw_{p(i)})g(\mu_{p(i)}) \right) \right) \right) \right) \right) \leq \\ &\frac{1}{n!} \sum_{p \in P_n} g \left( f^{-1} \left( \sum_{i=1}^n \left( \delta_i f \left( g^{-1} \left( (nw_{p(i)})g(1) \right) \right) \right) \right) \right) = g \left( f^{-1} \left( \left( \sum_{i=1}^n \delta_i \right) f(1) \right) \right) \end{aligned}$$

and

$$f^{-1} \left( \left( \sum_{i=1}^n \delta_i \right) f(0) \right) \leq g^{-1} \left( \frac{1}{n!} \sum_{p \in P_n} g \left( f^{-1} \left( \sum_{i=1}^n \left( \delta_i f \left( g^{-1} \left( (nw_{p(i)})g(\mu_{p(i)}) \right) \right) \right) \right) \right) \right) \leq f^{-1} \left( \left( \sum_{i=1}^n \delta_i \right) f(1) \right)$$

Finally, since  $f(t)$  and  $f^{-1}(t)$  are monotonically decreasing, we can obtain

$$\begin{aligned} f(0) &= \left( \frac{1}{\sum_{i=1}^n \delta_i} \right) f \left( f^{-1} \left( \left( \sum_{i=1}^n \delta_i \right) f(0) \right) \right) \geq \left( \frac{1}{\sum_{i=1}^n \delta_i} \right) f \left( g^{-1} \left( \frac{1}{n!} \sum_{p \in P_n} g \left( f^{-1} \left( \sum_{i=1}^n \left( \delta_i f \left( g^{-1} \left( (nw_{p(i)})g(\mu_{p(i)}) \right) \right) \right) \right) \right) \right) \right) \geq \\ &\left( \frac{1}{\sum_{i=1}^n \delta_i} \right) f \left( f^{-1} \left( \left( \sum_{i=1}^n \delta_i \right) f(1) \right) \right) = f(1) \end{aligned}$$

and

$$0 = f^{-1}(f(0)) \leq f^{-1} \left( \left( \frac{1}{\sum_{i=1}^n \delta_i} \right) f \left( g^{-1} \left( \frac{1}{n!} \sum_{p \in P_n} g \left( f^{-1} \left( \sum_{i=1}^n \left( \delta_i f \left( g^{-1} \left( (nw_{p(i)})g(\mu_{p(i)}) \right) \right) \right) \right) \right) \right) \right) \right) \leq f^{-1}(f(1)) = 1$$

That is  $0 \leq \mu \leq 1$ . Similarly, we can prove  $0 \leq \nu \leq 1$ .

2) We then prove  $0 \leq \mu^q + \nu^q \leq 1$ . The proof process is as follow:

Since  $0 \leq \mu \leq 1$  and  $0 \leq \nu \leq 1$ , we have  $0 \leq \mu^q \leq 1$  and  $0 \leq \nu^q \leq 1$ , and thus  $0 \leq \mu^q + \nu^q \leq 2$ .

According to the definition of a qROFN in Definition 1, we have  $\mu_{p(i)}^q + \nu_{p(i)}^q \leq 1$  and  $\mu_{p(i)}^q \leq 1 - \nu_{p(i)}^q$ . Because  $g(t)$  is monotonically increasing and  $g(1-t) = f(t)$ , we further have

$$g\left(\mu_{p(i)}^q\right) \leq g\left(1 - \nu_{p(i)}^q\right) = f\left(\nu_{p(i)}^q\right)$$

and

$$(nw_{p(i)})g\left(\mu_{p(i)}^q\right) \leq (nw_{p(i)})f\left(\nu_{p(i)}^q\right)$$



Because  $g^{-1}(t)$  is monotonically increasing and  $g^{-1}(t) = 1 - f^{-1}(t)$ , we can obtain

$$g^{-1}\left((nw_{p(i)})g\left(\mu_{p(i)}^q\right)\right) \leq g^{-1}\left((nw_{p(i)})f\left(v_{p(i)}^q\right)\right) = 1 - f^{-1}\left((nw_{p(i)})f\left(v_{p(i)}^q\right)\right)$$

Since  $f(t)$  is monotonically decreasing and  $f(1-t) = g(t)$ , we have

$$f\left(g^{-1}\left((nw_{p(i)})g\left(\mu_{p(i)}^q\right)\right)\right) \geq f\left(1 - f^{-1}\left((nw_{p(i)})f\left(v_{p(i)}^q\right)\right)\right) = g\left(f^{-1}\left((nw_{p(i)})f\left(v_{p(i)}^q\right)\right)\right)$$

and

$$\sum_{i=1}^n \left( \delta_i f\left(g^{-1}\left((nw_{p(i)})g\left(\mu_{p(i)}^q\right)\right)\right) \right) \geq \sum_{i=1}^n \left( \delta_i g\left(f^{-1}\left((nw_{p(i)})f\left(v_{p(i)}^q\right)\right)\right) \right)$$

Because  $f^{-1}(t)$  is monotonically decreasing and  $f^{-1}(t) = 1 - g^{-1}(t)$ , we can obtain

$$f^{-1}\left(\sum_{i=1}^n \left( \delta_i f\left(g^{-1}\left((nw_{p(i)})g\left(\mu_{p(i)}^q\right)\right)\right) \right)\right) \leq f^{-1}\left(\sum_{i=1}^n \left( \delta_i g\left(f^{-1}\left((nw_{p(i)})f\left(v_{p(i)}^q\right)\right)\right) \right)\right) = 1 - g^{-1}\left(\sum_{i=1}^n \left( \delta_i g\left(f^{-1}\left((nw_{p(i)})f\left(v_{p(i)}^q\right)\right)\right) \right)\right)$$

Since  $g(t)$  is monotonically increasing and  $g(1-t) = f(t)$ , we have

$$\begin{aligned} g\left(f^{-1}\left(\sum_{i=1}^n \left( \delta_i f\left(g^{-1}\left((nw_{p(i)})g\left(\mu_{p(i)}^q\right)\right)\right) \right)\right)\right) &\leq g\left(1 - g^{-1}\left(\sum_{i=1}^n \left( \delta_i g\left(f^{-1}\left((nw_{p(i)})f\left(v_{p(i)}^q\right)\right)\right) \right)\right)\right) = \\ f\left(g^{-1}\left(\sum_{i=1}^n \left( \delta_i g\left(f^{-1}\left((nw_{p(i)})f\left(v_{p(i)}^q\right)\right)\right) \right)\right)\right) \end{aligned}$$

and

$$\frac{1}{n!} \sum_{p \in P_n} g\left(f^{-1}\left(\sum_{i=1}^n \left( \delta_i f\left(g^{-1}\left((nw_{p(i)})g\left(\mu_{p(i)}^q\right)\right)\right) \right)\right)\right) \leq \frac{1}{n!} \sum_{p \in P_n} f\left(g^{-1}\left(\sum_{i=1}^n \left( \delta_i g\left(f^{-1}\left((nw_{p(i)})f\left(v_{p(i)}^q\right)\right)\right) \right)\right)\right)$$

Because  $g^{-1}(t)$  is monotonically increasing and  $g^{-1}(t) = 1 - f^{-1}(t)$ , we can obtain

$$\begin{aligned} g^{-1}\left(\frac{1}{n!} \sum_{p \in P_n} g\left(f^{-1}\left(\sum_{i=1}^n \left( \delta_i f\left(g^{-1}\left((nw_{p(i)})g\left(\mu_{p(i)}^q\right)\right)\right) \right)\right)\right)\right) &\leq g^{-1}\left(\frac{1}{n!} \sum_{p \in P_n} f\left(g^{-1}\left(\sum_{i=1}^n \left( \delta_i g\left(f^{-1}\left((nw_{p(i)})f\left(v_{p(i)}^q\right)\right)\right) \right)\right)\right)\right) = \\ 1 - f^{-1}\left(\frac{1}{n!} \sum_{p \in P_n} f\left(g^{-1}\left(\sum_{i=1}^n \left( \delta_i g\left(f^{-1}\left((nw_{p(i)})f\left(v_{p(i)}^q\right)\right)\right) \right)\right)\right)\right) \end{aligned}$$

Since  $f(t)$  is monotonically decreasing and  $f(1-t) = g(t)$ , we have

$$\begin{aligned} f\left(g^{-1}\left(\frac{1}{n!} \sum_{p \in P_n} g\left(f^{-1}\left(\sum_{i=1}^n \left( \delta_i f\left(g^{-1}\left((nw_{p(i)})g\left(\mu_{p(i)}^q\right)\right)\right) \right)\right)\right)\right)\right) &\geq f\left(1 - f^{-1}\left(\frac{1}{n!} \sum_{p \in P_n} f\left(g^{-1}\left(\sum_{i=1}^n \left( \delta_i g\left(f^{-1}\left((nw_{p(i)})f\left(v_{p(i)}^q\right)\right)\right) \right)\right)\right)\right)\right) = \\ g\left(f^{-1}\left(\frac{1}{n!} \sum_{p \in P_n} f\left(g^{-1}\left(\sum_{i=1}^n \left( \delta_i g\left(f^{-1}\left((nw_{p(i)})f\left(v_{p(i)}^q\right)\right)\right) \right)\right)\right)\right)\right) \end{aligned}$$

and

$$\begin{aligned} \left( \frac{1}{\sum_{i=1}^n \delta_i} \right) f\left(g^{-1}\left(\frac{1}{n!} \sum_{p \in P_n} g\left(f^{-1}\left(\sum_{i=1}^n \left( \delta_i f\left(g^{-1}\left((nw_{p(i)})g\left(\mu_{p(i)}^q\right)\right)\right) \right)\right)\right)\right)\right) &\geq \\ \left( \frac{1}{\sum_{i=1}^n \delta_i} \right) g\left(f^{-1}\left(\frac{1}{n!} \sum_{p \in P_n} f\left(g^{-1}\left(\sum_{i=1}^n \left( \delta_i g\left(f^{-1}\left((nw_{p(i)})f\left(v_{p(i)}^q\right)\right)\right) \right)\right)\right)\right)\right) \end{aligned}$$

Finally, because  $f^{-1}(t)$  is monotonically decreasing and  $f^{-1}(t) = 1 - g^{-1}(t)$ , we can obtain

$$f^{-1}\left(\left(\frac{1}{\sum_{i=1}^n \delta_i}\right) f\left(g^{-1}\left(\frac{1}{n!} \sum_{p \in P_n} g\left(f^{-1}\left(\sum_{i=1}^n \left( \delta_i f\left(g^{-1}\left((nw_{p(i)})g\left(\mu_{p(i)}^q\right)\right)\right) \right)\right)\right)\right)\right)\right) \leq$$

$$f^{-1}\left(\left(\frac{1}{\sum_{i=1}^n \delta_i}\right)g\left(f^{-1}\left(\frac{1}{n! \sum_{p \in P_n} f\left(g^{-1}\left(\sum_{i=1}^n \left(\delta_i g\left(f^{-1}\left((nw_{p(i)})f(v_{p(i)}^q)\right)\right)\right)\right)\right)\right)\right)\right)\right) =$$

$$1 - g^{-1}\left(\left(\frac{1}{\sum_{i=1}^n \delta_i}\right)g\left(f^{-1}\left(\frac{1}{n! \sum_{p \in P_n} f\left(g^{-1}\left(\sum_{i=1}^n \left(\delta_i g\left(f^{-1}\left((nw_{p(i)})f(v_{p(i)}^q)\right)\right)\right)\right)\right)\right)\right)\right)$$

When  $q = 1$ , according to the above inequality, we have

$$f^{-1}\left(\left(\frac{1}{\sum_{i=1}^n \delta_i}\right)f\left(g^{-1}\left(\frac{1}{n! \sum_{p \in P_n} g\left(f^{-1}\left(\sum_{i=1}^n \left(\delta_i f\left(g^{-1}\left((nw_{p(i)})g(\mu_{p(i)})\right)\right)\right)\right)\right)\right)\right)\right)\right) +$$

$$g^{-1}\left(\left(\frac{1}{\sum_{i=1}^n \delta_i}\right)g\left(f^{-1}\left(\frac{1}{n! \sum_{p \in P_n} f\left(g^{-1}\left(\sum_{i=1}^n \left(\delta_i g\left(f^{-1}\left((nw_{p(i)})f(v_{p(i)})\right)\right)\right)\right)\right)\right)\right)\right)\right) \leq 1$$

That is,  $\mu + v \leq 1$ .

Now we need to prove that the inequality also holds when  $q = 2, 3, \dots$ . Let  $m = 2, 3, \dots$ . The purpose is transformed into proof of  $\mu^m + v^m \leq 1$ .

According to  $\mu + v \leq 1$  and the binomial theorem, we can obtain

$$(\mu + v)^m = \sum_{k=0}^m (C_m^k \mu^{m-k} v^k) = \mu^m + v^m + \sum_{k=1}^{m-1} (C_m^k \mu^{m-k} v^k) \leq 1$$

Because  $\mu \geq 0$  and  $v \geq 0$ , we have

$$\sum_{k=1}^{m-1} (C_m^k \mu^{m-k} v^k) \geq 0$$

Therefore, we can obtain  $\mu^m + v^m \leq 1$ . Now it can be concluded that  $\mu^q + v^q \leq 1$  for  $q = 1, 2, 3, \dots$

Since we have proved  $0 \leq \mu^q + v^q \leq 2$  and  $\mu^q + v^q \leq 1$ , we can obtain  $0 \leq \mu^q + v^q \leq 1$ .

## APPENDIX F. PROOF OF THEOREM 6

**Proof:**

(1) Let

$$\mu = g^{-1}\left(\frac{1}{\sum_{i=1}^n \delta_i} g\left(f^{-1}\left(\frac{1}{n! \sum_{p \in P_n} f\left(g^{-1}\left(\sum_{i=1}^n \left(\delta_i g(\mu_{p(i)})\right)\right)\right)\right)\right)\right), \quad v = f^{-1}\left(\frac{1}{\sum_{i=1}^n \delta_i} f\left(g^{-1}\left(\frac{1}{n! \sum_{p \in P_n} g\left(f^{-1}\left(\sum_{i=1}^n \left(\delta_i f(v_{p(i)})\right)\right)\right)\right)\right)\right)$$

To prove  $qROFAGMM^{\Delta}(\Xi_1, \Xi_2, \dots, \Xi_n) = \langle \mu, v \rangle$ , we need to prove

$$\frac{1}{\sum_{i=1}^n \delta_i} \left( \bigotimes_{p \in P_n} \bigoplus_{i=1}^n (\delta_i \Xi_{p(i)}) \right)^{\frac{1}{n!}} = \langle \mu, v \rangle$$

The proof process is as follow:

According to the multiplication operation in Equation (3), we have

$$\delta_i \Xi_{p(i)} = \left\langle g^{-1}\left(\delta_i g(\mu_{p(i)})\right), f^{-1}\left(\delta_i f(v_{p(i)})\right) \right\rangle$$

According to the sum operation in Equation (1), we can obtain

$$\bigoplus_{i=1}^n (\delta_i \Xi_{p(i)}) = \left\langle g^{-1}\left(\sum_{i=1}^n \left(\delta_i g(\mu_{p(i)})\right)\right), f^{-1}\left(\sum_{i=1}^n \left(\delta_i f(v_{p(i)})\right)\right) \right\rangle$$

According to the product operation in Equation (2), we have

$$\bigotimes_{p \in P_n} \bigoplus_{i=1}^n (\delta_i \Xi_{p(i)}) = \left\langle f^{-1} \left( \sum_{p \in P_n} f \left( g^{-1} \left( \sum_{i=1}^n (\delta_i g(\mu_{p(i)})) \right) \right) \right), g^{-1} \left( \sum_{p \in P_n} g \left( f^{-1} \left( \sum_{i=1}^n (\delta_i f(v_{p(i)})) \right) \right) \right) \right\rangle$$

According to power operation in Equation (4), we can obtain

$$\left( \bigotimes_{p \in P_n} \bigoplus_{i=1}^n (\delta_i \Xi_{p(i)}) \right)^{\frac{1}{n!}} = \left\langle f^{-1} \left( \frac{1}{n!} \sum_{p \in P_n} f \left( g^{-1} \left( \sum_{i=1}^n (\delta_i g(\mu_{p(i)})) \right) \right) \right), g^{-1} \left( \frac{1}{n!} \sum_{p \in P_n} g \left( f^{-1} \left( \sum_{i=1}^n (\delta_i f(v_{p(i)})) \right) \right) \right) \right\rangle$$

The following expression is obtained according to the multiplication operation in Equation (3)

$$\frac{1}{\sum_{i=1}^n \delta_i} \left( \bigotimes_{p \in P_n} \bigoplus_{i=1}^n (\delta_i \Xi_{p(i)}) \right)^{\frac{1}{n!}} = \left\langle g^{-1} \left( \frac{1}{\sum_{i=1}^n \delta_i} g \left( f^{-1} \left( \frac{1}{n!} \sum_{p \in P_n} f \left( g^{-1} \left( \sum_{i=1}^n (\delta_i g(\mu_{p(i)})) \right) \right) \right) \right) \right), f^{-1} \left( \frac{1}{\sum_{i=1}^n \delta_i} f \left( g^{-1} \left( \frac{1}{n!} \sum_{p \in P_n} g \left( f^{-1} \left( \sum_{i=1}^n (\delta_i f(v_{p(i)})) \right) \right) \right) \right) \right) \right\rangle$$

(2) To prove  $qROFAGMM^{\Lambda}(\Xi_1, \Xi_2, \dots, \Xi_n)$  is a qROFN, we need to prove  $0 \leq \mu \leq 1$ ,  $0 \leq v \leq 1$ , and  $0 \leq \mu^q + v^q \leq 1$ . We firstly prove  $0 \leq \mu \leq 1$  and  $0 \leq v \leq 1$ . The proof process is as follow:

1) According to the definition of a qROFN in Definition 1, we have  $0 \leq \mu_{p(i)} \leq 1$ . Because  $g(t)$  is monotonically increasing, we further have

$$\delta_i g(0) \leq \delta_i g(\mu_{p(i)}) \leq \delta_i g(1)$$

and

$$\left( \sum_{i=1}^n \delta_i \right) g(0) = \sum_{i=1}^n (\delta_i g(0)) \leq \sum_{i=1}^n (\delta_i g(\mu_{p(i)})) \leq \sum_{i=1}^n (\delta_i g(1)) = \left( \sum_{i=1}^n \delta_i \right) g(1)$$

Since  $g^{-1}(t)$  is monotonically increasing, we can obtain

$$g^{-1} \left( \left( \sum_{i=1}^n \delta_i \right) g(0) \right) \leq g^{-1} \left( \sum_{i=1}^n (\delta_i g(\mu_{p(i)})) \right) \leq g^{-1} \left( \left( \sum_{i=1}^n \delta_i \right) g(1) \right)$$

Because  $f(t)$  is monotonically decreasing, we further have

$$f \left( g^{-1} \left( \left( \sum_{i=1}^n \delta_i \right) g(0) \right) \right) \geq f \left( g^{-1} \left( \sum_{i=1}^n (\delta_i g(\mu_{p(i)})) \right) \right) \geq f \left( g^{-1} \left( \left( \sum_{i=1}^n \delta_i \right) g(1) \right) \right)$$

and

$$(n!) f \left( g^{-1} \left( \left( \sum_{i=1}^n \delta_i \right) g(0) \right) \right) = \sum_{p \in P_n} f \left( g^{-1} \left( \left( \sum_{i=1}^n \delta_i \right) g(0) \right) \right) \geq \sum_{p \in P_n} f \left( g^{-1} \left( \sum_{i=1}^n (\delta_i g(\mu_{p(i)})) \right) \right) \geq \sum_{p \in P_n} f \left( g^{-1} \left( \left( \sum_{i=1}^n \delta_i \right) g(1) \right) \right) = (n!) f \left( g^{-1} \left( \left( \sum_{i=1}^n \delta_i \right) g(1) \right) \right)$$

and

$$f \left( g^{-1} \left( \left( \sum_{i=1}^n \delta_i \right) g(0) \right) \right) \geq \frac{1}{n!} \sum_{p \in P_n} f \left( g^{-1} \left( \sum_{i=1}^n (\delta_i g(\mu_{p(i)})) \right) \right) \geq f \left( g^{-1} \left( \left( \sum_{i=1}^n \delta_i \right) g(1) \right) \right)$$

Since  $f^{-1}(t)$  is monotonically decreasing, we can obtain

$$g^{-1}\left(\left(\sum_{i=1}^n \delta_i\right)g(0)\right) = f^{-1}\left(f\left(g^{-1}\left(\left(\sum_{i=1}^n \delta_i\right)g(0)\right)\right)\right) \leq f^{-1}\left(\frac{1}{n!} \sum_{p \in P_n} f\left(g^{-1}\left(\sum_{i=1}^n (\delta_i g(\mu_{p(i)}))\right)\right)\right) \leq f^{-1}\left(f\left(g^{-1}\left(\left(\sum_{i=1}^n \delta_i\right)g(1)\right)\right)\right) = g^{-1}\left(\left(\sum_{i=1}^n \delta_i\right)g(1)\right)$$

Because  $g(t)$  is monotonically increasing, we further have

$$\left(\sum_{i=1}^n \delta_i\right)g(0) = g\left(g^{-1}\left(\left(\sum_{i=1}^n \delta_i\right)g(0)\right)\right) \leq g\left(f^{-1}\left(\frac{1}{n!} \sum_{p \in P_n} f\left(g^{-1}\left(\sum_{i=1}^n (\delta_i g(\mu_{p(i)}))\right)\right)\right)\right) \leq g\left(g^{-1}\left(\left(\sum_{i=1}^n \delta_i\right)g(1)\right)\right) = \left(\sum_{i=1}^n \delta_i\right)g(1)$$

and

$$g(0) \leq \frac{1}{\sum_{i=1}^n \delta_i} g\left(f^{-1}\left(\frac{1}{n!} \sum_{p \in P_n} f\left(g^{-1}\left(\sum_{i=1}^n (\delta_i g(\mu_{p(i)}))\right)\right)\right)\right) \leq g(1)$$

Finally, since  $g^{-1}(t)$  is monotonically increasing, we can obtain

$$0 = g^{-1}(g(0)) \leq g^{-1}\left(\frac{1}{\sum_{i=1}^n \delta_i} g\left(f^{-1}\left(\frac{1}{n!} \sum_{p \in P_n} f\left(g^{-1}\left(\sum_{i=1}^n (\delta_i g(\mu_{p(i)}))\right)\right)\right)\right)\right) \leq g^{-1}(g(1)) = 1$$

That is  $0 \leq \mu \leq 1$ . Similarly, we can prove  $0 \leq \nu \leq 1$ .

2) We then prove  $0 \leq \mu^q + \nu^q \leq 1$ . The proof process is as follow:

Since  $0 \leq \mu \leq 1$  and  $0 \leq \nu \leq 1$ , we have  $0 \leq \mu^q \leq 1$  and  $0 \leq \nu^q \leq 1$ , and thus  $0 \leq \mu^q + \nu^q \leq 2$ .

According to the definition of a qROFN in Definition 1, we have  $\mu_{p(i)}^q + \nu_{p(i)}^q \leq 1$  and  $\mu_{p(i)}^q \leq 1 - \nu_{p(i)}^q$ . Since  $g(t)$  is monotonically increasing, we further have

$$g(\mu_{p(i)}^q) \leq g(1 - \nu_{p(i)}^q)$$

Because  $g(1-t) = f(t)$ , we have

$$g(\mu_{p(i)}^q) \leq f(\nu_{p(i)}^q)$$

and

$$\sum_{i=1}^n (\delta_i g(\mu_{p(i)}^q)) \leq \sum_{i=1}^n (\delta_i f(\nu_{p(i)}^q))$$

Since  $g^{-1}(t)$  is monotonically increasing, we can obtain

$$g^{-1}\left(\sum_{i=1}^n (\delta_i g(\mu_{p(i)}^q))\right) \leq g^{-1}\left(\sum_{i=1}^n (\delta_i f(\nu_{p(i)}^q))\right)$$

Because  $g^{-1}(t) = 1 - f^{-1}(t)$ , we have

$$g^{-1}\left(\sum_{i=1}^n (\delta_i g(\mu_{p(i)}^q))\right) \leq 1 - f^{-1}\left(\sum_{i=1}^n (\delta_i f(\nu_{p(i)}^q))\right)$$

Since  $f(t)$  is monotonically decreasing, we further have

$$f\left(g^{-1}\left(\sum_{i=1}^n (\delta_i g(\mu_{p(i)}^q))\right)\right) \geq f\left(1 - f^{-1}\left(\sum_{i=1}^n (\delta_i f(\nu_{p(i)}^q))\right)\right)$$

Because  $f(1-t) = g(t)$ , we can obtain

$$f\left(g^{-1}\left(\sum_{i=1}^n(\delta_i g(\mu_{p(i)}^q))\right)\right) \geq g\left(f^{-1}\left(\sum_{i=1}^n(\delta_i f(v_{p(i)}^q))\right)\right)$$

and

$$\frac{1}{n!} \sum_{p \in P_n} f\left(g^{-1}\left(\sum_{i=1}^n(\delta_i g(\mu_{p(i)}^q))\right)\right) \geq \frac{1}{n!} \sum_{p \in P_n} g\left(f^{-1}\left(\sum_{i=1}^n(\delta_i f(v_{p(i)}^q))\right)\right)$$

Since  $f^{-1}(t)$  is monotonically decreasing, we have

$$f^{-1}\left(\frac{1}{n!} \sum_{p \in P_n} f\left(g^{-1}\left(\sum_{i=1}^n(\delta_i g(\mu_{p(i)}^q))\right)\right)\right) \leq f^{-1}\left(\frac{1}{n!} \sum_{p \in P_n} g\left(f^{-1}\left(\sum_{i=1}^n(\delta_i f(v_{p(i)}^q))\right)\right)\right)$$

Because  $f^{-1}(t) = 1 - g^{-1}(t)$ , we further have

$$f^{-1}\left(\frac{1}{n!} \sum_{p \in P_n} f\left(g^{-1}\left(\sum_{i=1}^n(\delta_i g(\mu_{p(i)}^q))\right)\right)\right) \leq 1 - g^{-1}\left(\frac{1}{n!} \sum_{p \in P_n} g\left(f^{-1}\left(\sum_{i=1}^n(\delta_i f(v_{p(i)}^q))\right)\right)\right)$$

Since  $g(t)$  is monotonically increasing, we can obtain

$$\frac{1}{\sum_{i=1}^n \delta_i} g\left(f^{-1}\left(\frac{1}{n!} \sum_{p \in P_n} f\left(g^{-1}\left(\sum_{i=1}^n(\delta_i g(\mu_{p(i)}^q))\right)\right)\right)\right) \leq \frac{1}{\sum_{i=1}^n \delta_i} g\left(1 - g^{-1}\left(\frac{1}{n!} \sum_{p \in P_n} g\left(f^{-1}\left(\sum_{i=1}^n(\delta_i f(v_{p(i)}^q))\right)\right)\right)\right)$$

Because  $g(1-t) = f(t)$ , we can obtain

$$\frac{1}{\sum_{i=1}^n \delta_i} g\left(f^{-1}\left(\frac{1}{n!} \sum_{p \in P_n} f\left(g^{-1}\left(\sum_{i=1}^n(\delta_i g(\mu_{p(i)}^q))\right)\right)\right)\right) \leq \frac{1}{\sum_{i=1}^n \delta_i} f\left(g^{-1}\left(\frac{1}{n!} \sum_{p \in P_n} g\left(f^{-1}\left(\sum_{i=1}^n(\delta_i f(v_{p(i)}^q))\right)\right)\right)\right)$$

Since  $g^{-1}(t)$  is monotonically increasing, we have

$$g^{-1}\left(\frac{1}{\sum_{i=1}^n \delta_i} g\left(f^{-1}\left(\frac{1}{n!} \sum_{p \in P_n} f\left(g^{-1}\left(\sum_{i=1}^n(\delta_i g(\mu_{p(i)}^q))\right)\right)\right)\right)\right) \leq g^{-1}\left(\frac{1}{\sum_{i=1}^n \delta_i} f\left(g^{-1}\left(\frac{1}{n!} \sum_{p \in P_n} g\left(f^{-1}\left(\sum_{i=1}^n(\delta_i f(v_{p(i)}^q))\right)\right)\right)\right)\right)$$

Finally, because  $g^{-1}(t) = 1 - f^{-1}(t)$ , we can obtain

$$g^{-1}\left(\frac{1}{\sum_{i=1}^n \delta_i} g\left(f^{-1}\left(\frac{1}{n!} \sum_{p \in P_n} f\left(g^{-1}\left(\sum_{i=1}^n(\delta_i g(\mu_{p(i)}^q))\right)\right)\right)\right)\right) \leq 1 - f^{-1}\left(\frac{1}{\sum_{i=1}^n \delta_i} f\left(g^{-1}\left(\frac{1}{n!} \sum_{p \in P_n} g\left(f^{-1}\left(\sum_{i=1}^n(\delta_i f(v_{p(i)}^q))\right)\right)\right)\right)\right)$$

and

$$g^{-1}\left(\frac{1}{\sum_{i=1}^n \delta_i} g\left(f^{-1}\left(\frac{1}{n!} \sum_{p \in P_n} f\left(g^{-1}\left(\sum_{i=1}^n(\delta_i g(\mu_{p(i)}^q))\right)\right)\right)\right)\right) + f^{-1}\left(\frac{1}{\sum_{i=1}^n \delta_i} f\left(g^{-1}\left(\frac{1}{n!} \sum_{p \in P_n} g\left(f^{-1}\left(\sum_{i=1}^n(\delta_i f(v_{p(i)}^q))\right)\right)\right)\right)\right) \leq 1$$

When  $q = 1$ , according to the above inequality, we have

$$g^{-1}\left(\frac{1}{\sum_{i=1}^n \delta_i} g\left(f^{-1}\left(\frac{1}{n!} \sum_{p \in P_n} f\left(g^{-1}\left(\sum_{i=1}^n(\delta_i g(\mu_{p(i)}))\right)\right)\right)\right)\right) + f^{-1}\left(\frac{1}{\sum_{i=1}^n \delta_i} f\left(g^{-1}\left(\frac{1}{n!} \sum_{p \in P_n} g\left(f^{-1}\left(\sum_{i=1}^n(\delta_i f(v_{p(i)}))\right)\right)\right)\right)\right) \leq 1$$

That is,  $\mu + \nu \leq 1$ .

Now we need to prove that the inequality also holds when  $q = 2, 3, \dots$ . Let  $m = 2, 3, \dots$ . The purpose is transformed into

proof of  $\mu^m + \nu^m \leq 1$ .

According to  $\mu + \nu \leq 1$  and the binomial theorem, we can obtain

$$(\mu + \nu)^m = \sum_{k=0}^m \binom{m}{k} \mu^{m-k} \nu^k = \mu^m + \nu^m + \sum_{k=1}^{m-1} \binom{m}{k} \mu^{m-k} \nu^k \leq 1$$

Because  $\mu \geq 0$  and  $\nu \geq 0$ , we have

$$\sum_{k=1}^{m-1} \binom{m}{k} \mu^{m-k} \nu^k \geq 0$$

Therefore, we can obtain  $\mu^m + \nu^m \leq 1$ . Now it can be concluded that  $\mu^q + \nu^q \leq 1$  for  $q = 1, 2, 3, \dots$

Since we have proved  $0 \leq \mu^q + \nu^q \leq 2$  and  $\mu^q + \nu^q \leq 1$ , we can obtain  $0 \leq \mu^q + \nu^q \leq 1$ .

## APPENDIX G. PROOF OF THEOREM 7

**Proof:**

Since  $\mu_i = \mu$  and  $p(i)$  is a permutation of  $(1, 2, \dots, n)$ , we have

$$\delta_i g(\mu_{p(i)}) = \delta_i g(\mu)$$

and

$$\sum_{i=1}^n (\delta_i g(\mu_{p(i)})) = \sum_{i=1}^n (\delta_i g(\mu)) = \left( \sum_{i=1}^n \delta_i \right) (g(\mu))$$

Then we can obtain

$$g^{-1} \left( \sum_{i=1}^n (\delta_i g(\mu_{p(i)})) \right) = g^{-1} \left( \left( \sum_{i=1}^n \delta_i \right) (g(\mu)) \right)$$

and

$$f \left( g^{-1} \left( \sum_{i=1}^n (\delta_i g(\mu_{p(i)})) \right) \right) = f \left( g^{-1} \left( \left( \sum_{i=1}^n \delta_i \right) (g(\mu)) \right) \right)$$

Further, we have

$$\frac{1}{n!} \sum_{p \in P_n} f \left( g^{-1} \left( \sum_{i=1}^n (\delta_i g(\mu_{p(i)})) \right) \right) = \frac{1}{n!} \sum_{p \in P_n} \left( f \left( g^{-1} \left( \left( \sum_{i=1}^n \delta_i \right) (g(\mu)) \right) \right) \right) = f \left( g^{-1} \left( \left( \sum_{i=1}^n \delta_i \right) (g(\mu)) \right) \right)$$

and

$$f^{-1} \left( \frac{1}{n!} \sum_{p \in P_n} f \left( g^{-1} \left( \sum_{i=1}^n (\delta_i g(\mu_{p(i)})) \right) \right) \right) = f^{-1} \left( f \left( g^{-1} \left( \left( \sum_{i=1}^n \delta_i \right) (g(\mu)) \right) \right) \right) = g^{-1} \left( \left( \sum_{i=1}^n \delta_i \right) (g(\mu)) \right)$$

Finally, we can obtain

$$\frac{1}{\sum_{i=1}^n \delta_i} g \left( f^{-1} \left( \frac{1}{n!} \sum_{p \in P_n} f \left( g^{-1} \left( \sum_{i=1}^n (\delta_i g(\mu_{p(i)})) \right) \right) \right) \right) = \frac{1}{\sum_{i=1}^n \delta_i} g \left( g^{-1} \left( \left( \sum_{i=1}^n \delta_i \right) (g(\mu)) \right) \right) = g(\mu)$$

and

$$g^{-1} \left( \frac{1}{\sum_{i=1}^n \delta_i} g \left( f^{-1} \left( \frac{1}{n!} \sum_{p \in P_n} f \left( g^{-1} \left( \sum_{i=1}^n (\delta_i g(\mu_{p(i)})) \right) \right) \right) \right) \right) = g^{-1} (g(\mu)) = \mu$$

Similarly, we can prove

$$f^{-1} \left( \frac{1}{\sum_{i=1}^n \delta_i} f \left( g^{-1} \left( \frac{1}{n!} \sum_{p \in P_n} g \left( f^{-1} \left( \sum_{i=1}^n (\delta_i f(v_{p(i)})) \right) \right) \right) \right) \right) = v$$

Therefore, we can obtain  $qROFAGMM^\Delta(\Xi_1, \Xi_2, \dots, \Xi_n) = \langle \mu, v \rangle$ .

## APPENDIX H. PROOF OF THEOREM 8

**Proof:**

According to Theorem 6, we have

$$qROFAGMM^\Delta(\Xi_{1,1}, \Xi_{1,2}, \dots, \Xi_{1,n}) = \langle \mu_1, v_1 \rangle \quad \text{and} \quad qROFAGMM^\Delta(\Xi_{2,1}, \Xi_{2,2}, \dots, \Xi_{2,n}) = \langle \mu_{II}, v_{II} \rangle$$

where

$$\mu_1 = g^{-1} \left( \frac{1}{\sum_{i=1}^n \delta_i} g \left( f^{-1} \left( \frac{1}{n!} \sum_{p \in P_n} f \left( g^{-1} \left( \sum_{i=1}^n (\delta_i g(\mu_{p(1,i)})) \right) \right) \right) \right) \right), \quad v_1 = f^{-1} \left( \frac{1}{\sum_{i=1}^n \delta_i} f \left( g^{-1} \left( \frac{1}{n!} \sum_{p \in P_n} g \left( f^{-1} \left( \sum_{i=1}^n (\delta_i f(v_{p(1,i)})) \right) \right) \right) \right) \right)$$

$$\mu_{II} = g^{-1} \left( \frac{1}{\sum_{i=1}^n \delta_i} g \left( f^{-1} \left( \frac{1}{n!} \sum_{p \in P_n} f \left( g^{-1} \left( \sum_{i=1}^n (\delta_i g(\mu_{p(2,i)})) \right) \right) \right) \right) \right), \quad v_{II} = f^{-1} \left( \frac{1}{\sum_{i=1}^n \delta_i} f \left( g^{-1} \left( \frac{1}{n!} \sum_{p \in P_n} g \left( f^{-1} \left( \sum_{i=1}^n (\delta_i f(v_{p(2,i)})) \right) \right) \right) \right) \right)$$

and  $0 \leq \mu_1 \leq 1$  and  $0 \leq \mu_{II} \leq 1$ . Since  $\mu_{1,i} \geq \mu_{2,i}$  for all  $i = 1, 2, \dots, n$ , we have  $\mu_{p(1,i)} \geq \mu_{p(2,i)}$ . Because  $g(x)$  is monotonically increasing, we can obtain

$$\sum_{i=1}^n (\delta_i g(\mu_{p(1,i)})) \geq \sum_{i=1}^n (\delta_i g(\mu_{p(2,i)}))$$

Since  $g^{-1}(x)$  is monotonically increasing, we have

$$g^{-1} \left( \sum_{i=1}^n (\delta_i g(\mu_{p(1,i)})) \right) \geq g^{-1} \left( \sum_{i=1}^n (\delta_i g(\mu_{p(2,i)})) \right)$$

Because  $f(x)$  is monotonically decreasing, we can obtain

$$\frac{1}{n!} \sum_{p \in P_n} f \left( g^{-1} \left( \sum_{i=1}^n (\delta_i g(\mu_{p(1,i)})) \right) \right) \leq \frac{1}{n!} \sum_{p \in P_n} f \left( g^{-1} \left( \sum_{i=1}^n (\delta_i g(\mu_{p(2,i)})) \right) \right)$$

Since  $f^{-1}(x)$  is monotonically decreasing, we have

$$f^{-1} \left( \frac{1}{n!} \sum_{p \in P_n} f \left( g^{-1} \left( \sum_{i=1}^n (\delta_i g(\mu_{p(1,i)})) \right) \right) \right) \geq f^{-1} \left( \frac{1}{n!} \sum_{p \in P_n} f \left( g^{-1} \left( \sum_{i=1}^n (\delta_i g(\mu_{p(2,i)})) \right) \right) \right)$$

Because  $g(x)$  is monotonically increasing, we can obtain

$$\frac{1}{\sum_{i=1}^n \delta_i} g \left( f^{-1} \left( \frac{1}{n!} \sum_{p \in P_n} f \left( g^{-1} \left( \sum_{i=1}^n (\delta_i g(\mu_{p(1,i)})) \right) \right) \right) \right) \geq \frac{1}{\sum_{i=1}^n \delta_i} g \left( f^{-1} \left( \frac{1}{n!} \sum_{p \in P_n} f \left( g^{-1} \left( \sum_{i=1}^n (\delta_i g(\mu_{p(2,i)})) \right) \right) \right) \right)$$

Finally, since  $g^{-1}(x)$  is monotonically increasing, we have

$$g^{-1} \left( \frac{1}{\sum_{i=1}^n \delta_i} g \left( f^{-1} \left( \frac{1}{n!} \sum_{p \in P_n} f \left( g^{-1} \left( \sum_{i=1}^n (\delta_i g(\mu_{p(1,i)})) \right) \right) \right) \right) \right) \geq g^{-1} \left( \frac{1}{\sum_{i=1}^n \delta_i} g \left( f^{-1} \left( \frac{1}{n!} \sum_{p \in P_n} f \left( g^{-1} \left( \sum_{i=1}^n (\delta_i g(\mu_{p(2,i)})) \right) \right) \right) \right) \right)$$

That is  $\mu_I \geq \mu_{II}$ . Similarly, we can prove  $\nu_I \leq \nu_{II}$ . Since

$$S(qROFAGMM^\Delta(\Xi_{1,1}, \Xi_{1,2}, \dots, \Xi_{1,n})) = \mu_I^q - \nu_I^q \text{ and } S(qROFAGMM^\Delta(\Xi_{2,1}, \Xi_{2,2}, \dots, \Xi_{2,n})) = \mu_{II}^q - \nu_{II}^q$$

and  $1 \geq \mu_I \geq \mu_{II} \geq 0$  and  $0 \leq \nu_I \leq \nu_{II} \leq 1$ , we can obtain

$$S(qROFAGMM^\Delta(\Xi_{1,1}, \Xi_{1,2}, \dots, \Xi_{1,n})) \geq S(qROFAGMM^\Delta(\Xi_{2,1}, \Xi_{2,2}, \dots, \Xi_{2,n}))$$

and thus  $qROFAGMM^\Delta(\Xi_{1,1}, \Xi_{1,2}, \dots, \Xi_{1,n}) \geq qROFAGMM^\Delta(\Xi_{2,1}, \Xi_{2,2}, \dots, \Xi_{2,n})$ .

## APPENDIX I. PROOF OF THEOREM 9

**Proof:**

According to Theorem 8, we have

$$qROFAGMM^\Delta(\Xi_{LB}, \Xi_{LB}, \dots, \Xi_{LB}) \leq qROFAGMM^\Delta(\Xi_1, \Xi_2, \dots, \Xi_n) \leq qROFAGMM^\Delta(\Xi_{UB}, \Xi_{UB}, \dots, \Xi_{UB})$$

According to Theorem 7, we have

$$qROFAGMM^\Delta(\Xi_{LB}, \Xi_{LB}, \dots, \Xi_{LB}) = \Xi_{LB} \text{ and } qROFAGMM^\Delta(\Xi_{UB}, \Xi_{UB}, \dots, \Xi_{UB}) = \Xi_{UB}$$

Therefore, we can obtain  $\Xi_{LB} \leq qROFAGMM^\Delta(\Xi_1, \Xi_2, \dots, \Xi_n) \leq \Xi_{UB}$ .

## APPENDIX J. PROOF OF THEOREM 10

**Proof:**

(1) Let

$$\mu = g^{-1} \left( \left( \frac{1}{\sum_{i=1}^n \delta_i} \right) g \left( f^{-1} \left( \frac{1}{n!} \sum_{p \in P_n} f \left( g^{-1} \left( \sum_{i=1}^n (\delta_i g(f^{-1}((nw_{p(i)}))f(\mu_{p(i)}))) \right) \right) \right) \right) \right),$$

$$\nu = f^{-1} \left( \left( \frac{1}{\sum_{i=1}^n \delta_i} \right) f \left( g^{-1} \left( \frac{1}{n!} \sum_{p \in P_n} g \left( f^{-1} \left( \sum_{i=1}^n (\delta_i f(g^{-1}((nw_{p(i)}))g(\nu_{p(i)}))) \right) \right) \right) \right) \right)$$

To prove  $qROFWAGMM^\Delta(\Xi_1, \Xi_2, \dots, \Xi_n) = \langle \mu, \nu \rangle$ , we need to prove

$$\frac{1}{\sum_{i=1}^n \delta_i} \left( \bigotimes_{p \in P_n} \bigoplus_{i=1}^n (\delta_i \Xi_{p(i)}^{nw_{p(i)}}) \right)^{\frac{1}{n!}} = \langle \mu, \nu \rangle$$

The proof process is as follow:

According to the power operation in Equation (4), we have

$$\Xi_{p(i)}^{nw_{p(i)}} = \left\langle f^{-1}((nw_{p(i)})f(\mu_{p(i)})), g^{-1}((nw_{p(i)})g(\nu_{p(i)})) \right\rangle$$

According to the multiplication operation in Equation (3), we can obtain

$$\delta_i \Xi_{p(i)}^{nw_{p(i)}} = \left\langle g^{-1}(\delta_i g(f^{-1}((nw_{p(i)})f(\mu_{p(i)})))) \right\rangle, f^{-1}(\delta_i f(g^{-1}((nw_{p(i)})g(\nu_{p(i)})))) \right\rangle$$

According to the sum operation in Equation (1), we have

$$\bigoplus_{i=1}^n (\delta_i \Xi_{p(i)}^{nw_{p(i)}}) = \left\langle g^{-1} \left( \sum_{i=1}^n (\delta_i g(f^{-1}((nw_{p(i)})f(\mu_{p(i)})))) \right) \right\rangle, f^{-1} \left( \sum_{i=1}^n (\delta_i f(g^{-1}((nw_{p(i)})g(\nu_{p(i)})))) \right) \right\rangle$$

According to the product operation in Equation (2), we can obtain





$$g(0) = \left(1 / \sum_{i=1}^n \delta_i\right) g \left( g^{-1} \left( \left( \sum_{i=1}^n \delta_i \right) g(0) \right) \right) \leq \left(1 / \sum_{i=1}^n \delta_i\right) g \left( f^{-1} \left( \frac{1}{n!} \sum_{p \in P_n} f \left( g^{-1} \left( \sum_{i=1}^n \left( \delta_i g \left( f^{-1} \left( (nw_{p(i)}) f(\mu_{p(i)}) \right) \right) \right) \right) \right) \right) \right) \right) \leq \left(1 / \sum_{i=1}^n \delta_i\right) g \left( g^{-1} \left( \left( \sum_{i=1}^n \delta_i \right) g(1) \right) \right) = g(1)$$

and

$$0 = g^{-1}(g(0)) \leq g^{-1} \left( \left(1 / \sum_{i=1}^n \delta_i\right) g \left( f^{-1} \left( \frac{1}{n!} \sum_{p \in P_n} f \left( g^{-1} \left( \sum_{i=1}^n \left( \delta_i g \left( f^{-1} \left( (nw_{p(i)}) f(\mu_{p(i)}) \right) \right) \right) \right) \right) \right) \right) \right) \leq g^{-1}(g(1)) = 1$$

That is  $0 \leq \mu \leq 1$ . Similarly, we can prove  $0 \leq \nu \leq 1$ .

2) We then prove  $0 \leq \mu^q + \nu^q \leq 1$ . The proof process is as follow:

Since  $0 \leq \mu \leq 1$  and  $0 \leq \nu \leq 1$ , we have  $0 \leq \mu^q \leq 1$  and  $0 \leq \nu^q \leq 1$ , and thus  $0 \leq \mu^q + \nu^q \leq 2$ .

According to the definition of a qROFN in Definition 1, we have  $\mu_{p(i)}^q + \nu_{p(i)}^q \leq 1$  and  $\mu_{p(i)}^q \leq 1 - \nu_{p(i)}^q$ . Because  $f(t)$  is monotonically decreasing and  $f(1-t) = g(t)$ , we further have

$$f(\mu_{p(i)}^q) \geq f(1 - \nu_{p(i)}^q) = g(\nu_{p(i)}^q)$$

and

$$(nw_{p(i)})f(\mu_{p(i)}^q) \geq (nw_{p(i)})g(\nu_{p(i)}^q)$$

Because  $f^{-1}(t)$  is monotonically decreasing and  $f^{-1}(t) = 1 - g^{-1}(t)$ , we can obtain

$$f^{-1}((nw_{p(i)})f(\mu_{p(i)}^q)) \leq f^{-1}((nw_{p(i)})g(\nu_{p(i)}^q)) = 1 - g^{-1}((nw_{p(i)})g(\nu_{p(i)}^q))$$

Since  $g(t)$  is monotonically increasing and  $g(1-t) = f(t)$ , we have

$$g(f^{-1}((nw_{p(i)})f(\mu_{p(i)}^q))) \leq g(1 - g^{-1}((nw_{p(i)})g(\nu_{p(i)}^q))) = f(g^{-1}((nw_{p(i)})g(\nu_{p(i)}^q)))$$

and

$$\sum_{i=1}^n \left( \delta_i g \left( f^{-1} \left( (nw_{p(i)}) f \left( \mu_{p(i)}^q \right) \right) \right) \right) \leq \sum_{i=1}^n \left( \delta_i f \left( g^{-1} \left( (nw_{p(i)}) g \left( \nu_{p(i)}^q \right) \right) \right) \right)$$

Because  $g^{-1}(t)$  is monotonically increasing and  $g^{-1}(t) = 1 - f^{-1}(t)$ , we can obtain

$$g^{-1} \left( \sum_{i=1}^n \left( \delta_i g \left( f^{-1} \left( (nw_{p(i)}) f \left( \mu_{p(i)}^q \right) \right) \right) \right) \right) \leq g^{-1} \left( \sum_{i=1}^n \left( \delta_i f \left( g^{-1} \left( (nw_{p(i)}) g \left( \nu_{p(i)}^q \right) \right) \right) \right) \right) = 1 - f^{-1} \left( \sum_{i=1}^n \left( \delta_i f \left( g^{-1} \left( (nw_{p(i)}) g \left( \nu_{p(i)}^q \right) \right) \right) \right) \right)$$

Since  $f(t)$  is monotonically decreasing and  $f(1-t) = g(t)$ , we have

$$f \left( g^{-1} \left( \sum_{i=1}^n \left( \delta_i g \left( f^{-1} \left( (nw_{p(i)}) f \left( \mu_{p(i)}^q \right) \right) \right) \right) \right) \right) \geq f \left( 1 - f^{-1} \left( \sum_{i=1}^n \left( \delta_i f \left( g^{-1} \left( (nw_{p(i)}) g \left( \nu_{p(i)}^q \right) \right) \right) \right) \right) \right) = g \left( f^{-1} \left( \sum_{i=1}^n \left( \delta_i f \left( g^{-1} \left( (nw_{p(i)}) g \left( \nu_{p(i)}^q \right) \right) \right) \right) \right) \right)$$

and

$$\frac{1}{n!} \sum_{p \in P_n} f \left( g^{-1} \left( \sum_{i=1}^n \left( \delta_i g \left( f^{-1} \left( (nw_{p(i)}) f \left( \mu_{p(i)}^q \right) \right) \right) \right) \right) \right) \geq \frac{1}{n!} \sum_{p \in P_n} g \left( f^{-1} \left( \sum_{i=1}^n \left( \delta_i f \left( g^{-1} \left( (nw_{p(i)}) g \left( \nu_{p(i)}^q \right) \right) \right) \right) \right) \right)$$

Because  $f^{-1}(t)$  is monotonically decreasing and  $f^{-1}(t) = 1 - g^{-1}(t)$ , we can obtain

$$f^{-1} \left( \frac{1}{n!} \sum_{p \in P_n} f \left( g^{-1} \left( \sum_{i=1}^n \left( \delta_i g \left( f^{-1} \left( (nw_{p(i)}) f \left( \mu_{p(i)}^q \right) \right) \right) \right) \right) \right) \right) \leq f^{-1} \left( \frac{1}{n!} \sum_{p \in P_n} g \left( f^{-1} \left( \sum_{i=1}^n \left( \delta_i f \left( g^{-1} \left( (nw_{p(i)}) g \left( \nu_{p(i)}^q \right) \right) \right) \right) \right) \right) \right) =$$

$$1 - g^{-1} \left( \frac{1}{n!} \sum_{p \in P_n} g \left( f^{-1} \left( \sum_{i=1}^n \left( \delta_i f \left( g^{-1} \left( (nw_{p(i)}) g(v_{p(i)}^q) \right) \right) \right) \right) \right) \right)$$

Since  $g(t)$  is monotonically increasing and  $g(1-t) = f(t)$ , we have

$$g \left( f^{-1} \left( \frac{1}{n!} \sum_{p \in P_n} f \left( g^{-1} \left( \sum_{i=1}^n \left( \delta_i g \left( f^{-1} \left( (nw_{p(i)}) f(\mu_{p(i)}^q) \right) \right) \right) \right) \right) \right) \right) \leq g \left( 1 - g^{-1} \left( \frac{1}{n!} \sum_{p \in P_n} g \left( f^{-1} \left( \sum_{i=1}^n \left( \delta_i f \left( g^{-1} \left( (nw_{p(i)}) g(v_{p(i)}^q) \right) \right) \right) \right) \right) \right) \right) = f \left( g^{-1} \left( \frac{1}{n!} \sum_{p \in P_n} g \left( f^{-1} \left( \sum_{i=1}^n \left( \delta_i f \left( g^{-1} \left( (nw_{p(i)}) g(v_{p(i)}^q) \right) \right) \right) \right) \right) \right) \right)$$

and

$$\left( \frac{1}{\sum_{i=1}^n \delta_i} \right) g \left( f^{-1} \left( \frac{1}{n!} \sum_{p \in P_n} f \left( g^{-1} \left( \sum_{i=1}^n \left( \delta_i g \left( f^{-1} \left( (nw_{p(i)}) f(\mu_{p(i)}^q) \right) \right) \right) \right) \right) \right) \right) \leq \left( \frac{1}{\sum_{i=1}^n \delta_i} \right) f \left( g^{-1} \left( \frac{1}{n!} \sum_{p \in P_n} g \left( f^{-1} \left( \sum_{i=1}^n \left( \delta_i f \left( g^{-1} \left( (nw_{p(i)}) g(v_{p(i)}^q) \right) \right) \right) \right) \right) \right) \right)$$

Finally, because  $g^{-1}(t)$  is monotonically increasing and  $g^{-1}(t) = 1 - f^{-1}(t)$ , we can obtain

$$g^{-1} \left( \left( \frac{1}{\sum_{i=1}^n \delta_i} \right) g \left( f^{-1} \left( \frac{1}{n!} \sum_{p \in P_n} f \left( g^{-1} \left( \sum_{i=1}^n \left( \delta_i g \left( f^{-1} \left( (nw_{p(i)}) f(\mu_{p(i)}^q) \right) \right) \right) \right) \right) \right) \right) \right) \leq g^{-1} \left( \left( \frac{1}{\sum_{i=1}^n \delta_i} \right) f \left( g^{-1} \left( \frac{1}{n!} \sum_{p \in P_n} g \left( f^{-1} \left( \sum_{i=1}^n \left( \delta_i f \left( g^{-1} \left( (nw_{p(i)}) g(v_{p(i)}^q) \right) \right) \right) \right) \right) \right) \right) \right) = 1 - f^{-1} \left( \left( \frac{1}{\sum_{i=1}^n \delta_i} \right) f \left( g^{-1} \left( \frac{1}{n!} \sum_{p \in P_n} g \left( f^{-1} \left( \sum_{i=1}^n \left( \delta_i f \left( g^{-1} \left( (nw_{p(i)}) g(v_{p(i)}^q) \right) \right) \right) \right) \right) \right) \right) \right)$$

When  $q = 1$ , according to the above inequality, we have

$$g^{-1} \left( \left( \frac{1}{\sum_{i=1}^n \delta_i} \right) g \left( f^{-1} \left( \frac{1}{n!} \sum_{p \in P_n} f \left( g^{-1} \left( \sum_{i=1}^n \left( \delta_i g \left( f^{-1} \left( (nw_{p(i)}) f(\mu_{p(i)}) \right) \right) \right) \right) \right) \right) \right) \right) + f^{-1} \left( \left( \frac{1}{\sum_{i=1}^n \delta_i} \right) f \left( g^{-1} \left( \frac{1}{n!} \sum_{p \in P_n} g \left( f^{-1} \left( \sum_{i=1}^n \left( \delta_i f \left( g^{-1} \left( (nw_{p(i)}) g(v_{p(i)}) \right) \right) \right) \right) \right) \right) \right) \right) \leq 1$$

That is,  $\mu + v \leq 1$ .

Now we need to prove that the inequality also holds when  $q = 2, 3, \dots$ . Let  $m = 2, 3, \dots$ . The purpose is transformed into proof of  $\mu^m + v^m \leq 1$ .

According to  $\mu + v \leq 1$  and the binomial theorem, we can obtain

$$(\mu + v)^m = \sum_{k=0}^m (C_m^k \mu^{m-k} v^k) = \mu^m + v^m + \sum_{k=1}^{m-1} (C_m^k \mu^{m-k} v^k) \leq 1$$

Because  $\mu \geq 0$  and  $v \geq 0$ , we have

$$\sum_{k=1}^{m-1} (C_m^k \mu^{m-k} v^k) \geq 0$$

Therefore, we can obtain  $\mu^m + v^m \leq 1$ . Now it can be concluded that  $\mu^q + v^q \leq 1$  for  $q = 1, 2, 3, \dots$

Since we have proved  $0 \leq \mu^q + v^q \leq 2$  and  $\mu^q + v^q \leq 1$ , we can obtain  $0 \leq \mu^q + v^q \leq 1$ .
